# Supplementary material
Source: PubMed Central journal article supplement (PMC5773362)
Supplement: NIHMS852033-supplement-supplement_1.pdf [file NIHMS852033-supplement-supplement_1.pdf]

1 **Supporting Information**

2  
3  
4 **Quantitative Drinking Water Arsenic Concentrations in Field**  
5 **Environments Using Mobile Phone Photometry of Field Kits**

6  
7 EZAZUL HAQUE<sup>a,b</sup>, BRIAN J. MAILLOUX<sup>b</sup>, DAISY DE WOLFF<sup>b</sup>, SABINA GILIOLI<sup>b</sup>,  
8 COLETTE KELLY<sup>b</sup>, ERSHAD AHMED <sup>c</sup>, CHRISTOPHER SMALL<sup>a</sup>, KAZI MATIN  
9 AHMED<sup>c</sup>, ALEXANDER VAN GEEN<sup>a</sup>, BENJAMIN C. BOSTICK<sup>a</sup>

10  
11 <sup>a</sup> *Lamont-Doherty Earth Observatory of Columbia University, Route 9 W, Palisades, New York*  
12 *10964, United States*

13 <sup>b</sup> *Department of Environmental Sciences, Barnard College, 3009 Broadway, New York, New*  
14 *York 10027, United States*

15 <sup>c</sup> *Department of Geology, Dhaka University, Dhaka 1000, Bangladesh*

16  
17

18 Figure SI-1: Absorbance spectrum of field kit test strips of a blank and tests used for lab  
19 solutions of As concentrations of 10, 50, 150, and 500  $\mu\text{g/L}$ .  
20  
21

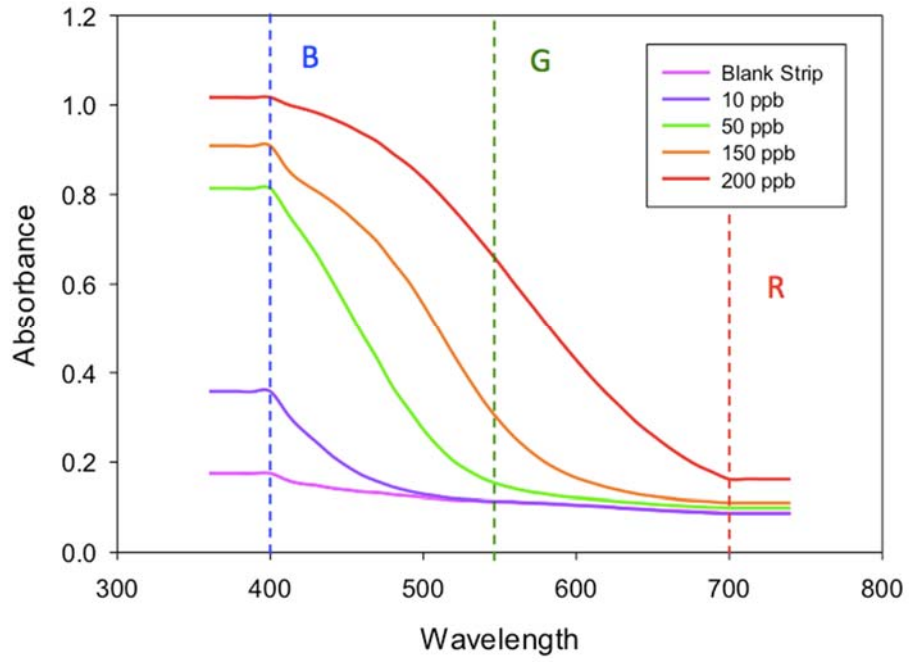

22

23 Figure SI-2: Relationship between ICP-MS measured As concentration ( $\mu\text{g/L}$ ) for RGB color  
24 values a) not normalized and b) normalized. Field and lab samples are represented by gray and  
25 blue points respectively.  
26  
27  
28

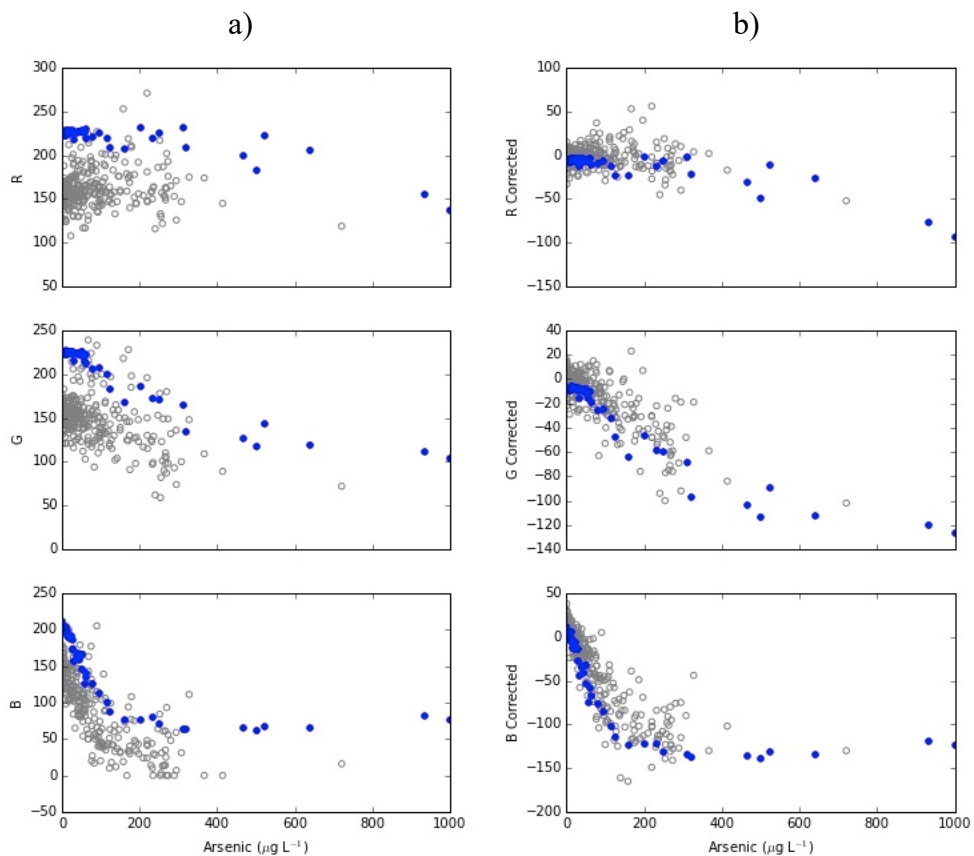

29  
30  
31

32 Figure SI-3: Summary of experiment done on April 16<sup>th</sup>, 2015 in laboratory controlled  
 33 conditions showing the black normalized photograph taken on an iPhone 5S (A),  
 34 relationship between normalized R, G, B with respect to As concentration (B), inductively  
 35 coupled plasma mass spectrometry (ICP-MS) determined versus photo predicted As  
 36 concentration for full range up to 1500  $\mu\text{g/L}$ , and an expanded version of (C) is shown in (D)  
 37 for As concentrations up to 150  $\mu\text{g/L}$ .

38  
 39  
 40  
 41

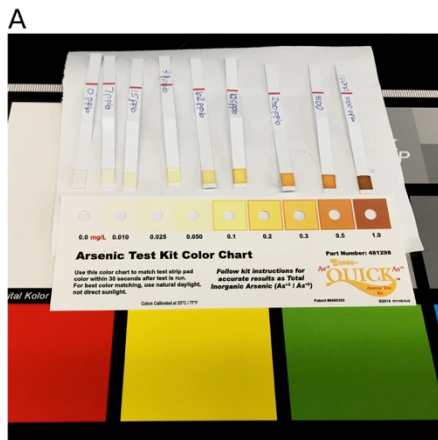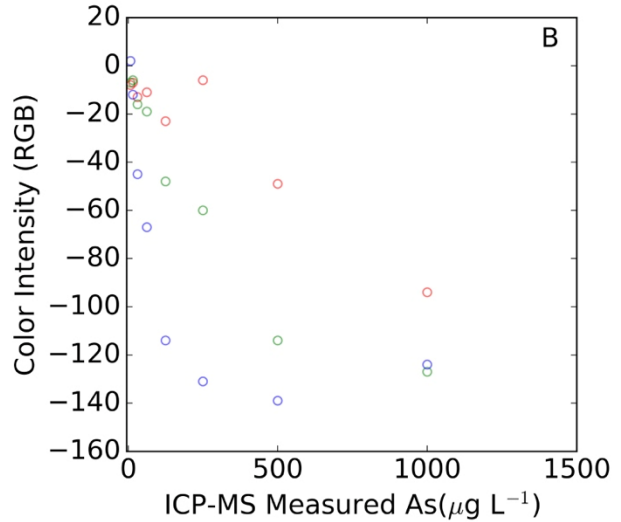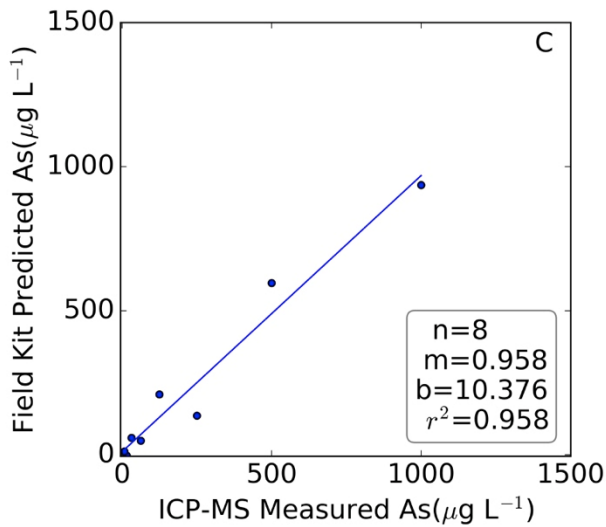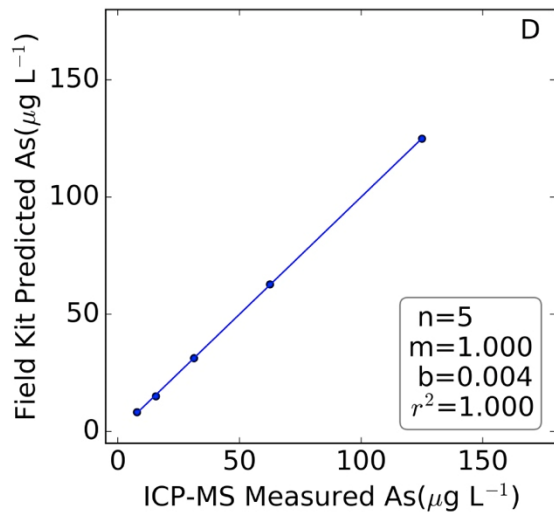

42  
 43

44 Figure SI-4: Summary of experiment done on April 23<sup>rd</sup>, 2015 in laboratory controlled  
 45 conditions showing the black normalized photograph taken on an iPhone 5S (A),  
 46 relationship between normalized R, G, B with respect to As concentration (B), inductively  
 47 coupled plasma mass spectrometry (ICP-MS) determined versus photo predicted As  
 48 concentration for full range up to 1500  $\mu\text{g/L}$ , and an expanded version of (C) is shown in (D)  
 49 for As concentrations up to 150  $\mu\text{g/L}$ .  
 50  
 51

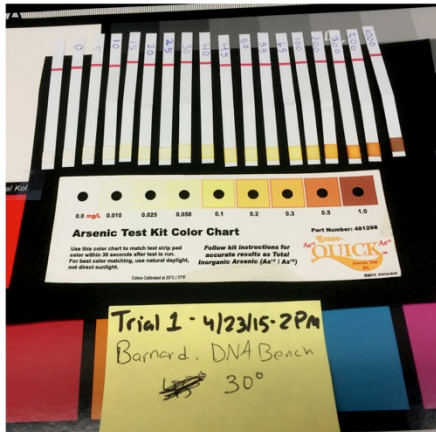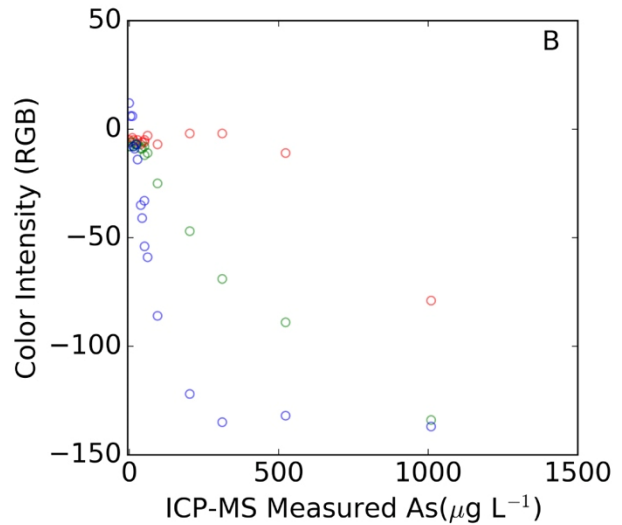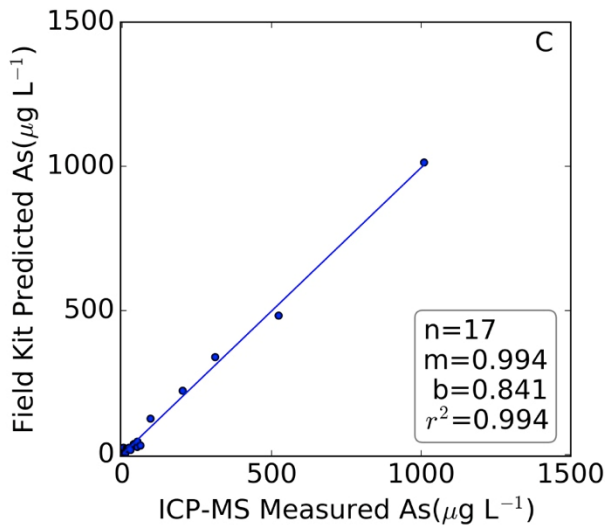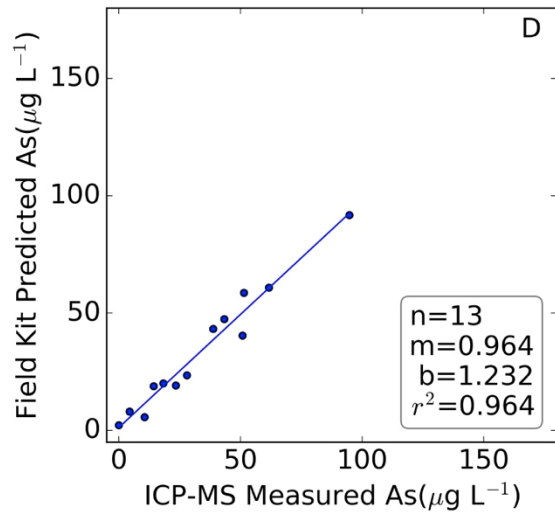

52

53 Figure SI-5: Summary of experiment done on October 7<sup>th</sup>, 2015 in laboratory controlled  
 54 conditions showing the black normalized photograph taken on an iPhone 5S (A), relationship  
 55 between normalized R, G, B with respect to As concentration (B), inductively coupled plasma  
 56 mass spectrometry (ICP-MS) determined versus photo predicted As concentration for full range  
 57 up to 1500  $\mu\text{g/L}$ , and an expanded version of (C) is shown in (D) for As concentrations up to 150  
 58  $\mu\text{g/L}$ .

59  
 60  
 61

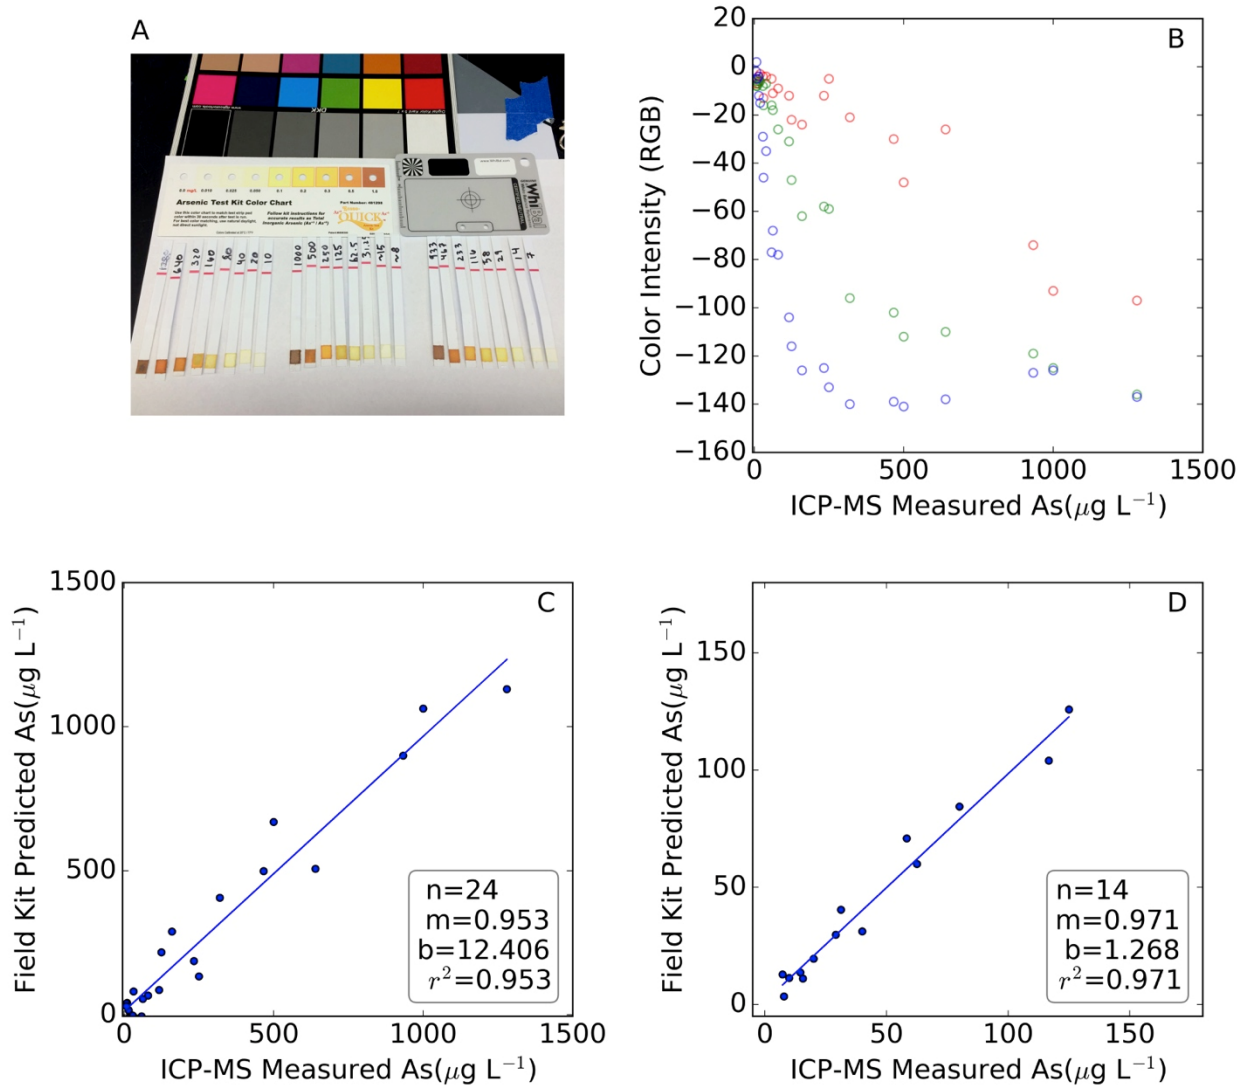

62  
 63

64 Figure SI-6: Summary of experiment done on October 7<sup>th</sup>, 2015 in laboratory controlled  
 65 conditions showing the black normalized photograph taken on an iPhone 5S (A), relationship  
 66 between normalized R, G, B with respect to As concentration (B), inductively coupled plasma  
 67 mass spectrometry (ICP-MS) determined versus photo predicted As concentration for full range  
 68 up to 1500  $\mu\text{g/L}$ , and an expanded version of (C) is shown in (D) for As concentrations up to 150  
 69  $\mu\text{g/L}$ .  
 70

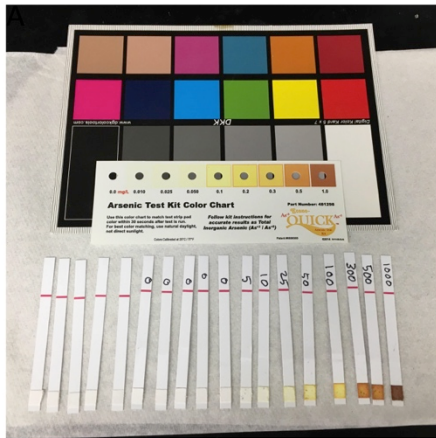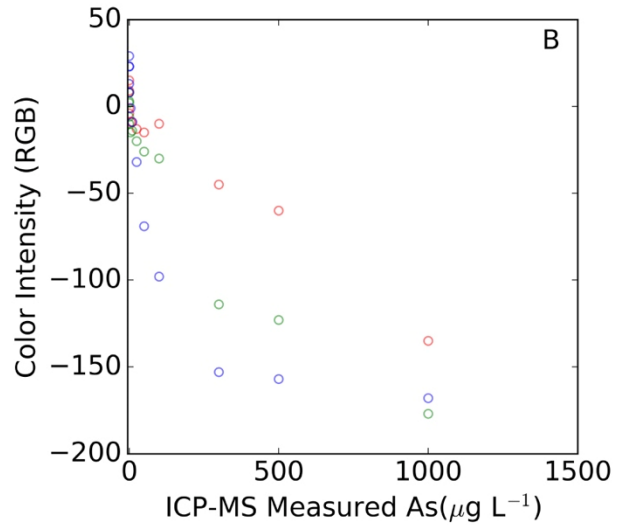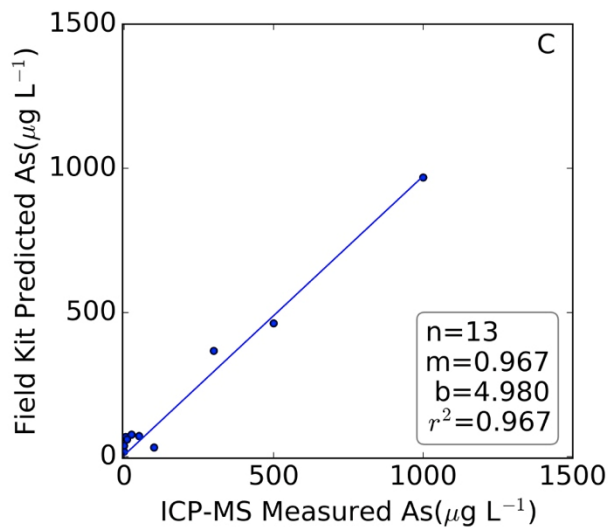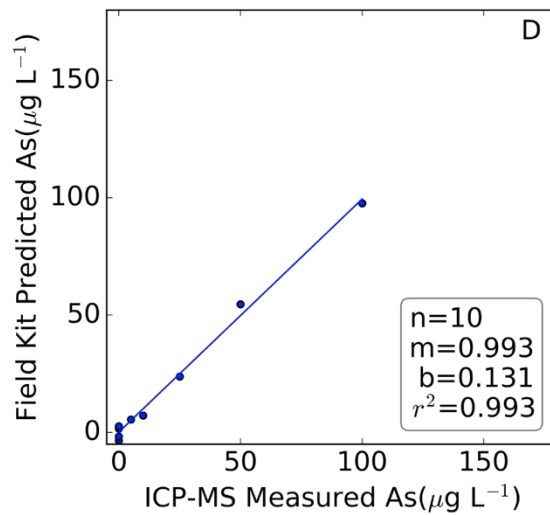

71  
 72  
 73  
 74

75 Figure SI-7: Summary of experiment done in laboratory controlled conditions from Figure  
 76 SX-SX showing the black normalized photograph taken on an iPhone 5S (A), relationship  
 77 between normalized R, G, B with respect to As concentration (B), inductively coupled  
 78 plasma mass spectrometry (ICP-MS) determined versus photo predicted As concentration  
 79 for full range up to 1500  $\mu\text{g/L}$ , and an expanded version of (C) is shown in (D) for As  
 80 concentrations up to 150  $\mu\text{g/L}$ .  
 81  
 82

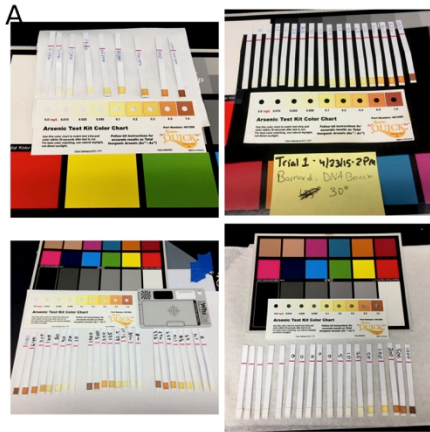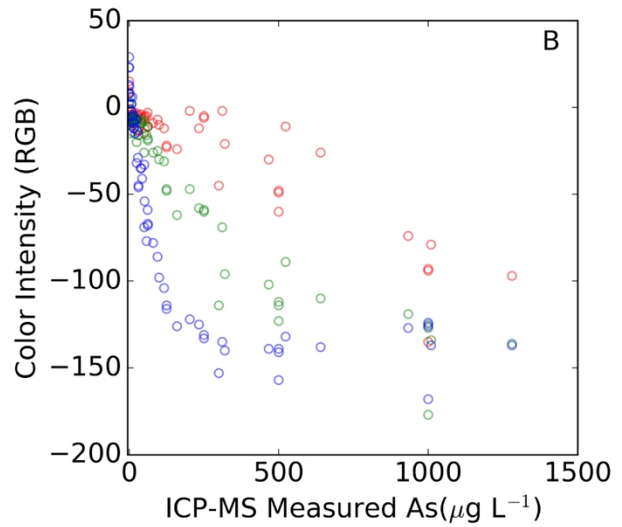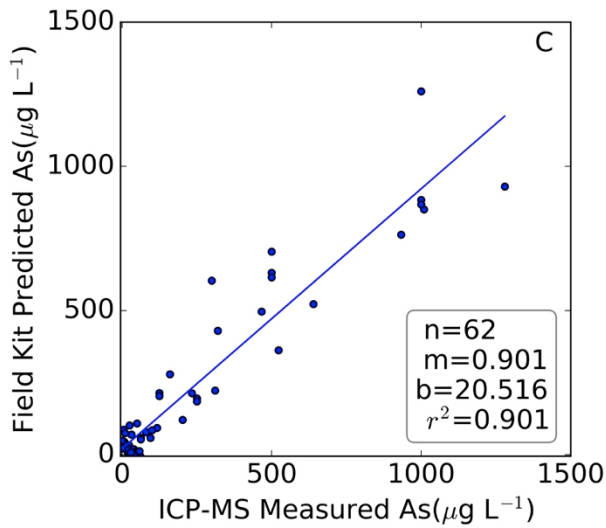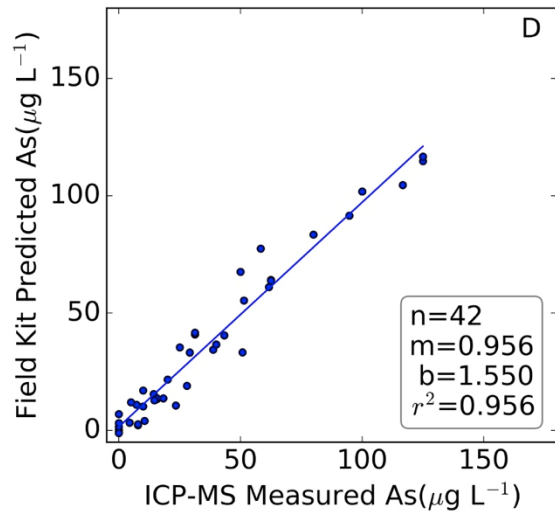

83  
 84



85 Figure SI-8: Summary of tests done in field in Araihaazar, Bangladesh on July-2015 showing  
 86 the black normalized photograph taken on an iPhone 5S (A), relationship between  
 87 normalized R, G, B with respect to As concentration (B), inductively coupled plasma mass  
 88 spectrometry (ICP-MS) determined versus photo predicted As concentration for full range  
 89 up to 1500  $\mu\text{g/L}$ , and an expanded version of (C) is shown in (D) for As concentrations up to  
 90 150  $\mu\text{g/L}$ .  
 91

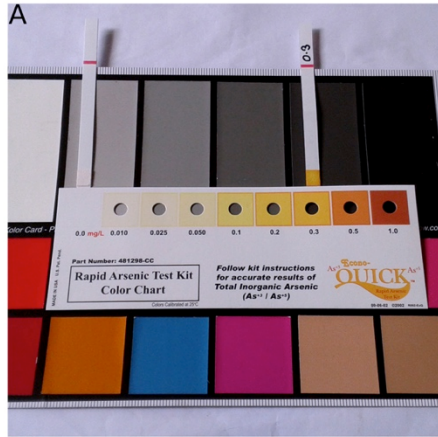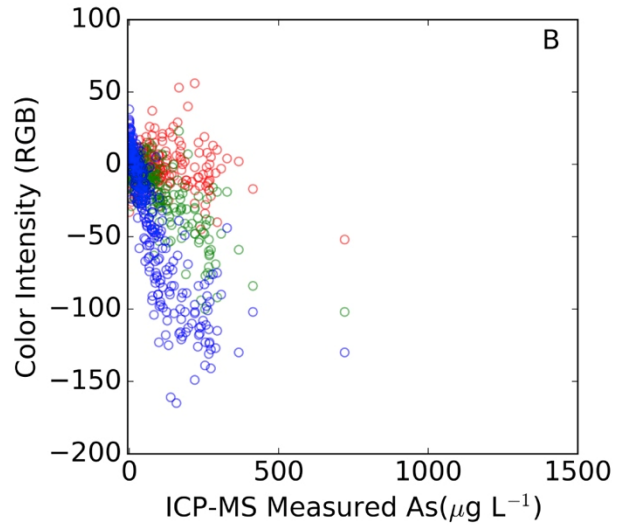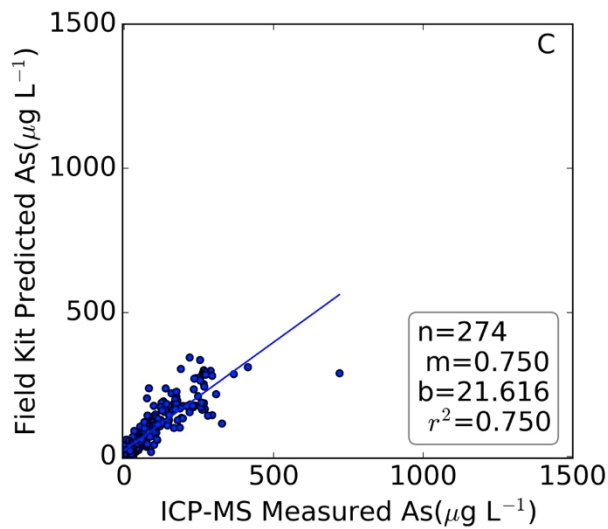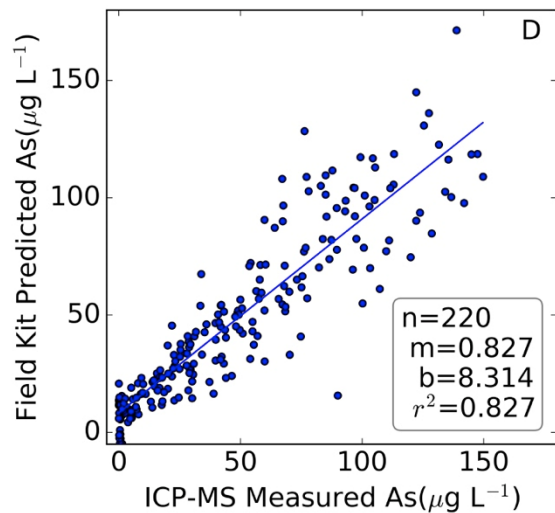

92  
 93  
 94

95  
96  
97  
98  
99  
100  
101  
102  
103  
104

Figure SI-9. ColorMeter readings for (a) Red and (b) Green as a function of As concentrations in 217 well-water samples from Bangladesh first tested in the field with the kit and subsequently analyzed in the laboratory by ICPMS. Readings for the reacting portion of the strip that was photographed in the field immediately after testing are adjusted by the proportion required to yield a constant R and G readings of 200 for a white portion of the test strip. The regression line shown in (a) considers only samples containing up to 100 µg/L As.

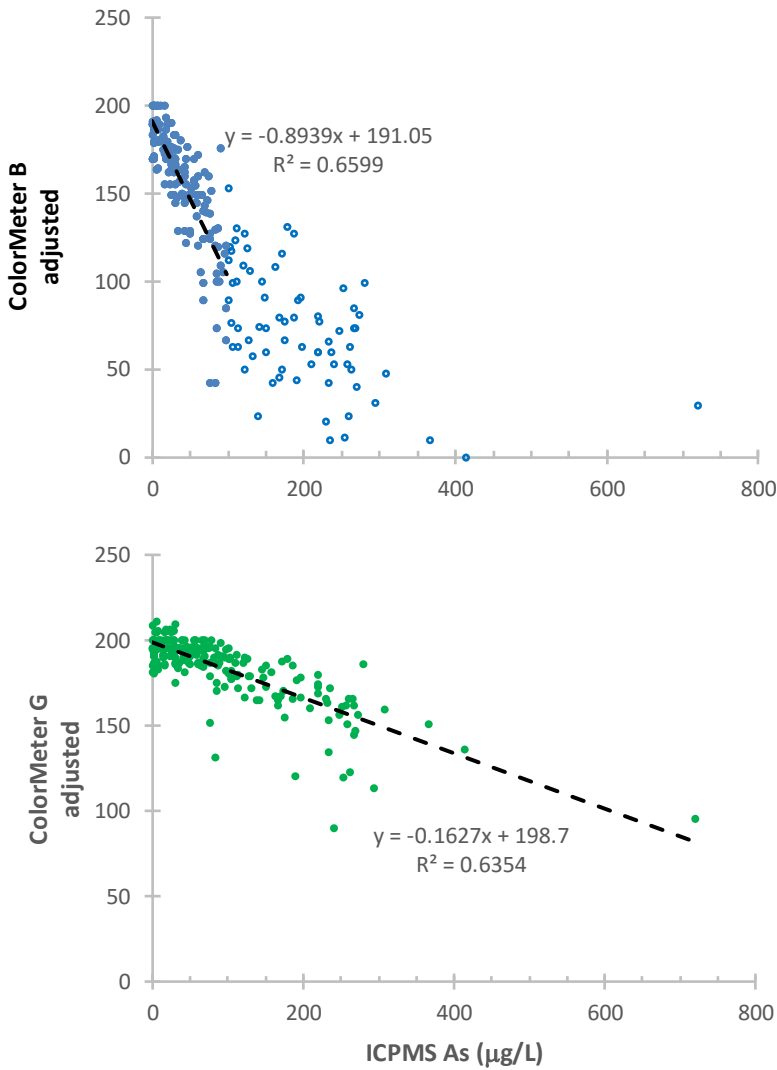

105  
106  
107
